# Supplementary material for: Bulk Segregant Analysis Using Single Nucleotide Polymorphism Microarrays
Source: PubMed Central journal article supplement (PMC3029305; doi:10.1371/journal.pone.0015993), 2011-01-27

# Markers vs. Controls (sense)

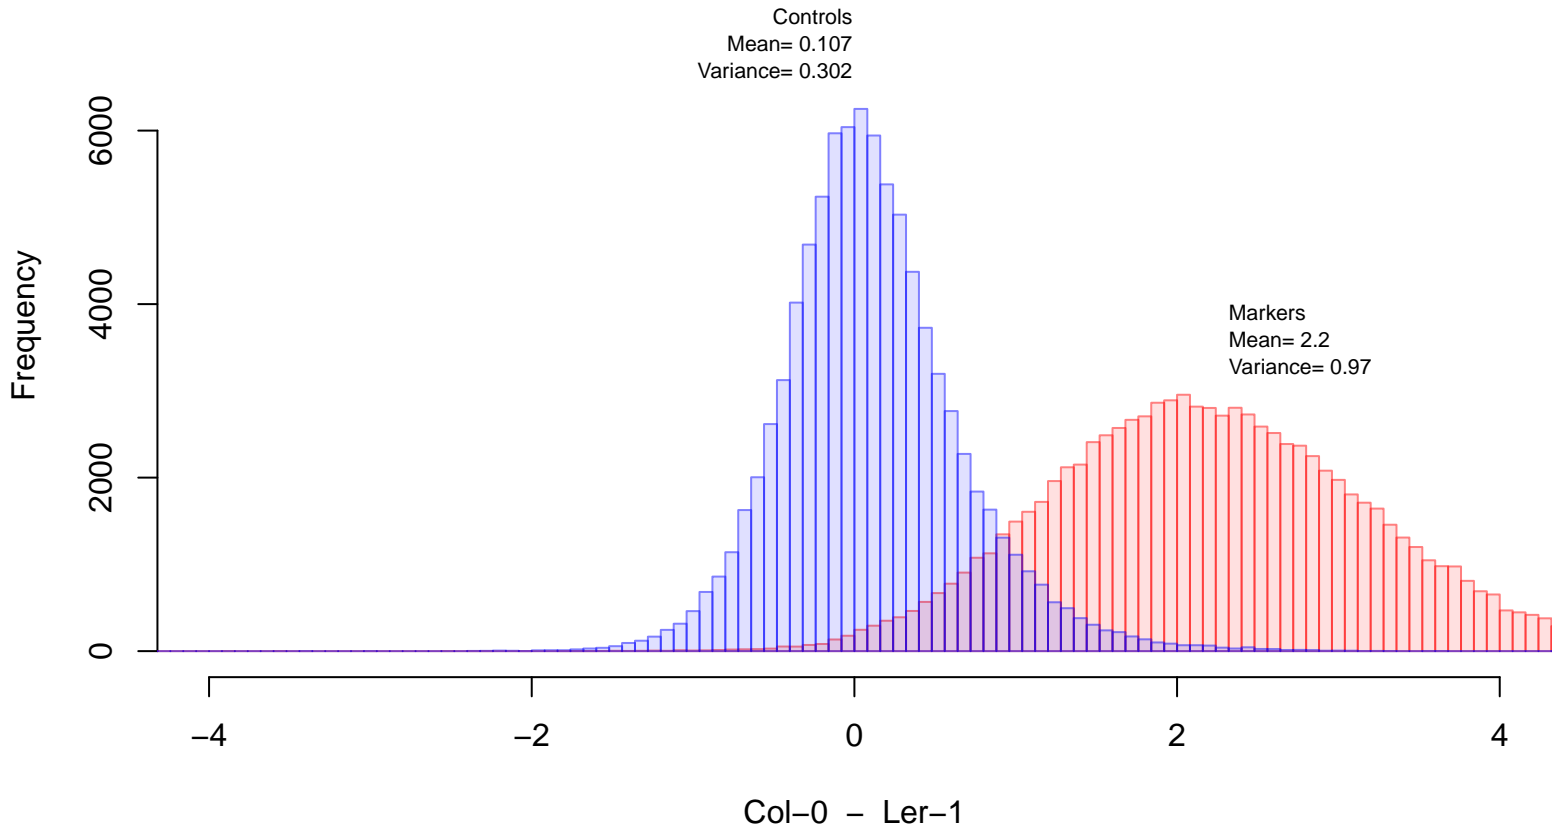

# P1, P2, and pseudo-F1 (sense)

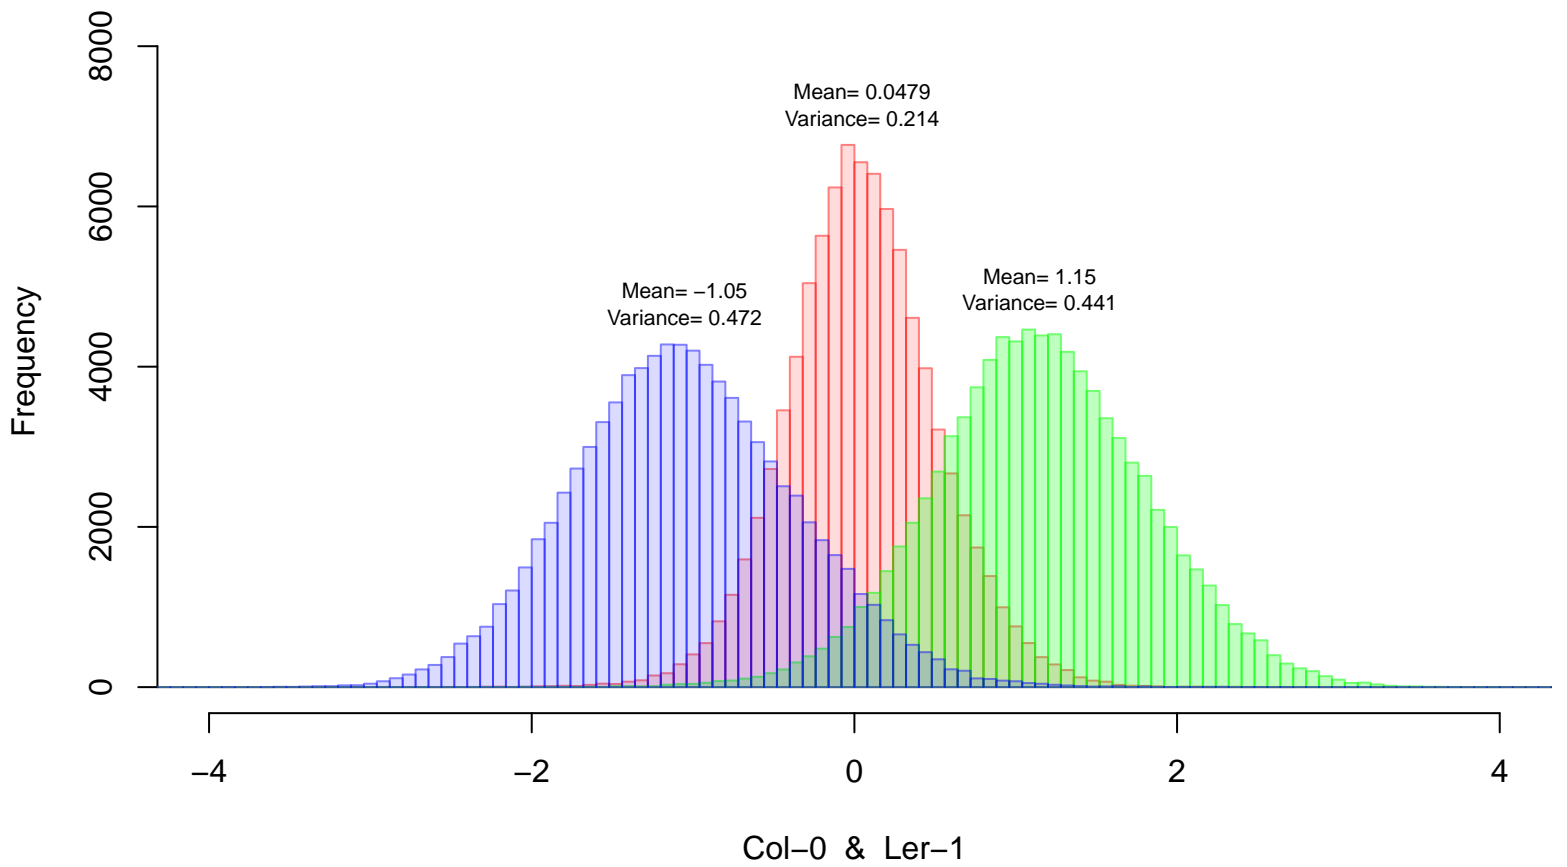

Supplement: pone.0015993.s007.pdf [file pone.0015993.s007.pdf]
