# Supplementary material for: Bulk Segregant Analysis Using Single Nucleotide Polymorphism Microarrays
Source: PLOS journal article supplement (doi:10.1371/journal.pone.0015993), 2011-01-27

# Markers vs. Controls (antisense)

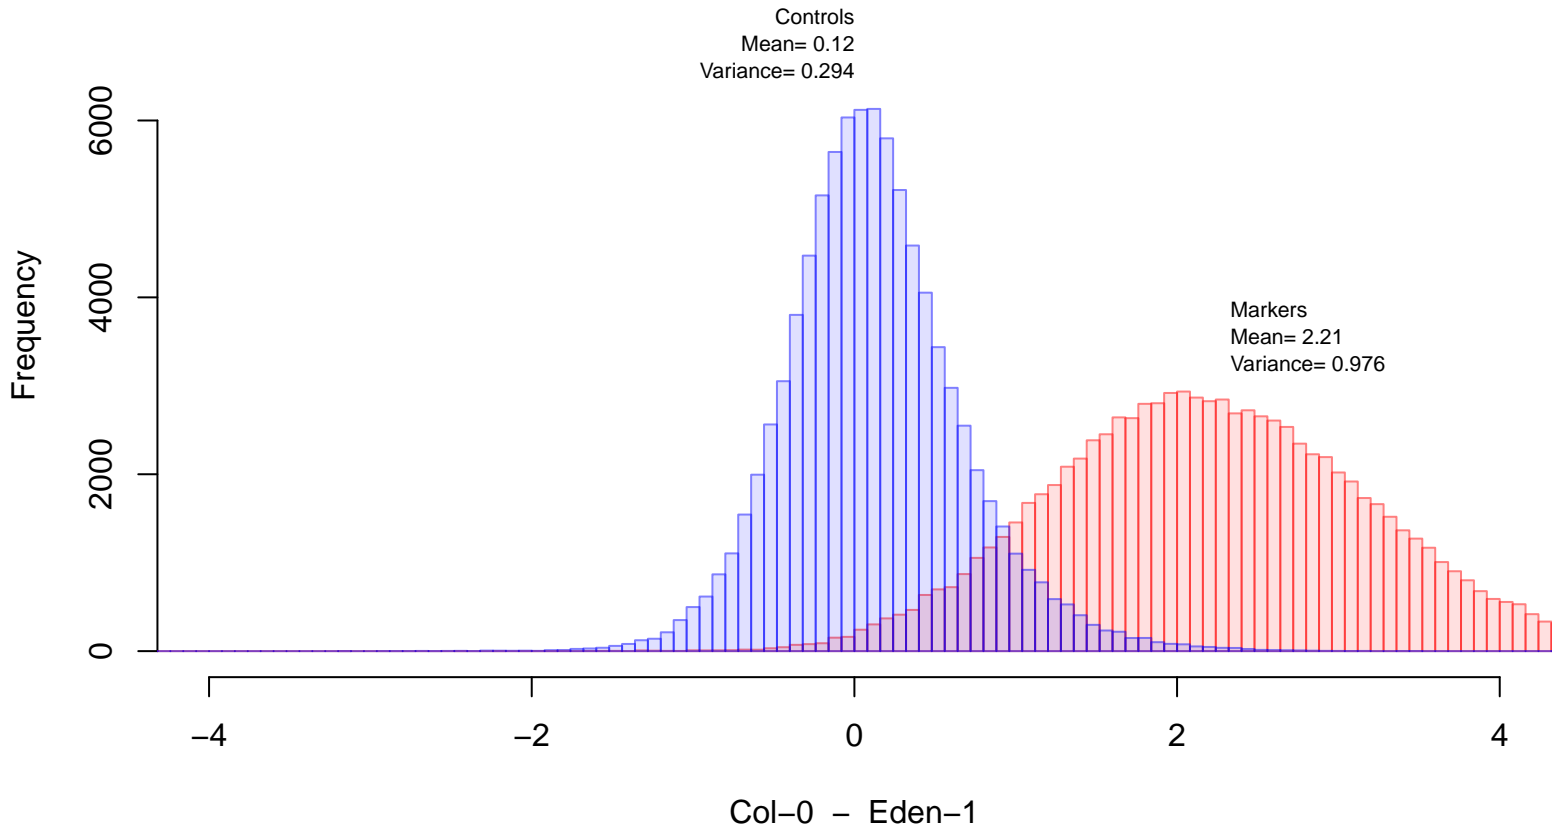

# P1, P2, and pseudo-F1 (antisense)

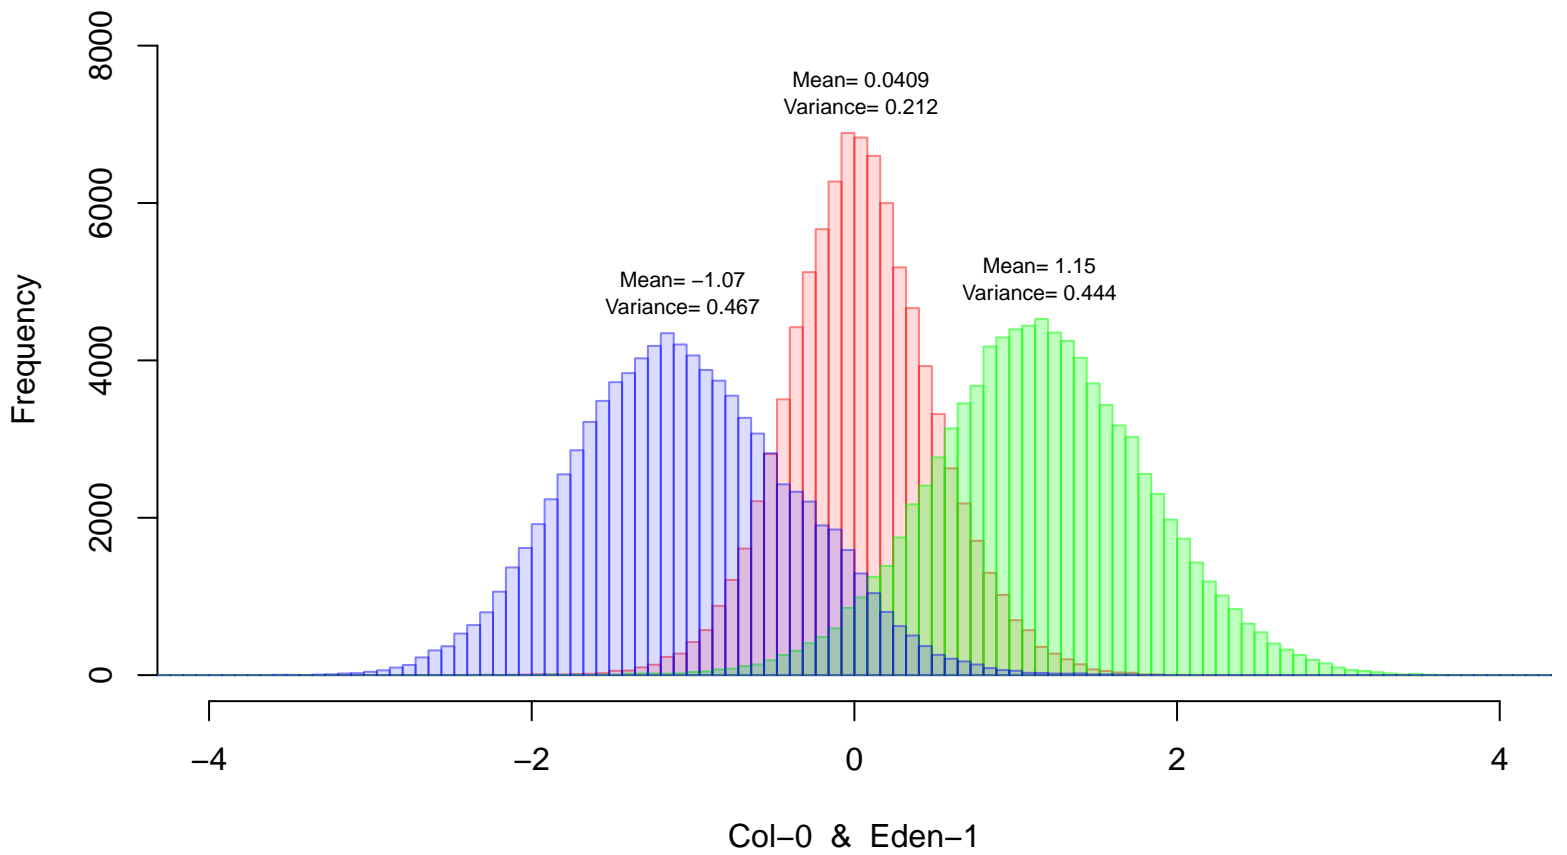

Supplement: S2 (10.1371/journal.pone.0015993.s002) [file journal.pone.0015993.s002.pdf › journal.pone.0015993.s002.pdf]
