# Supplementary material for: Bulk Segregant Analysis Using Single Nucleotide Polymorphism Microarrays
Source: PLOS journal article supplement (doi:10.1371/journal.pone.0015993), 2011-01-27

### Markers vs. Controls (antisense)

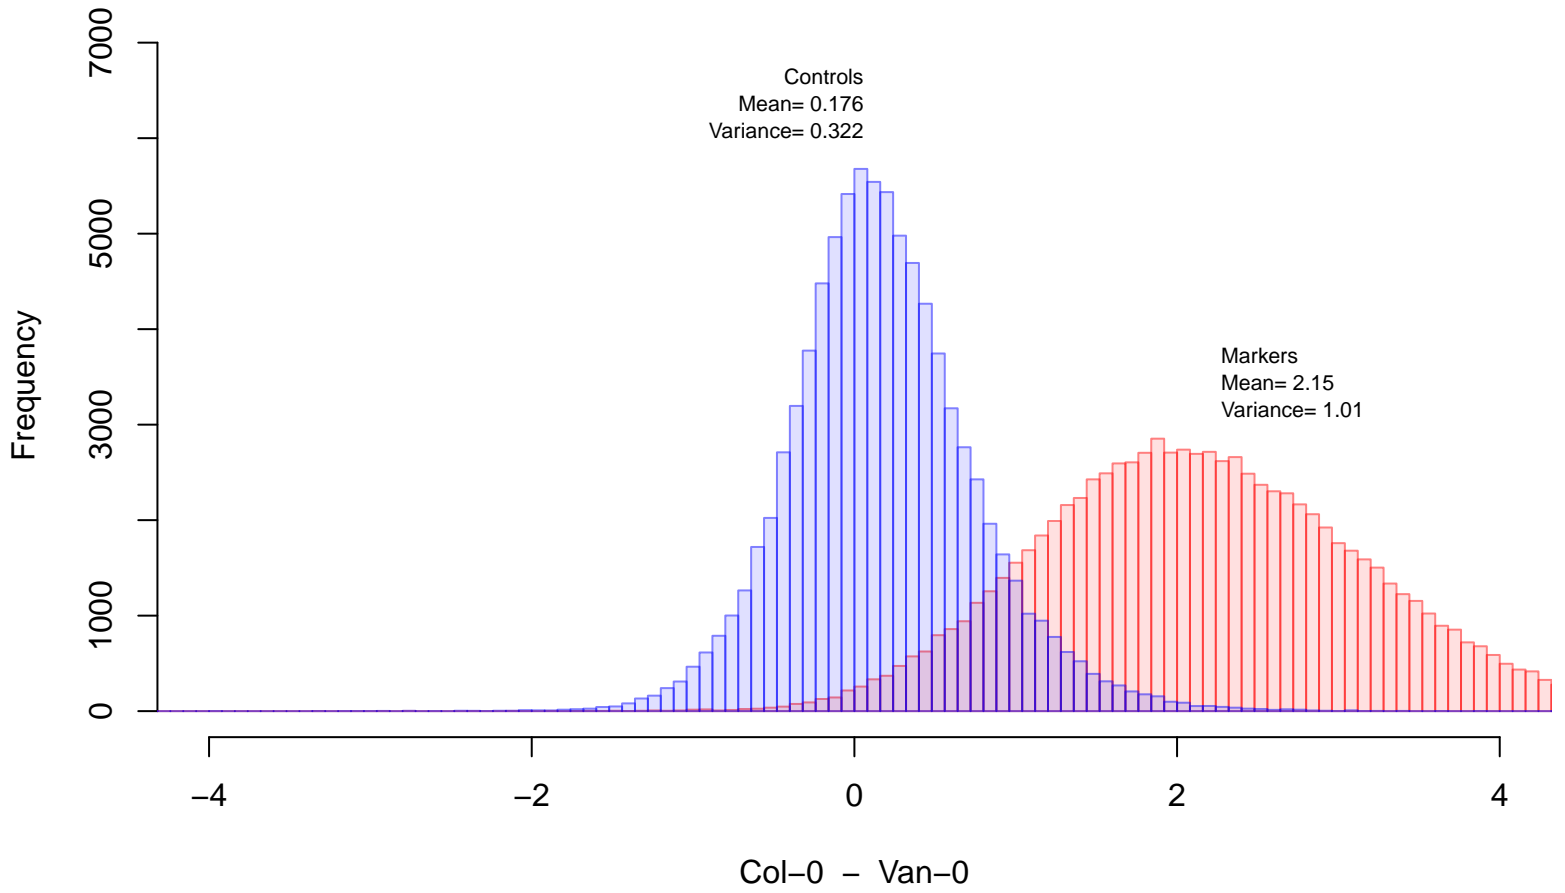

### P1, P2, and pseudo-F1 (antisense)

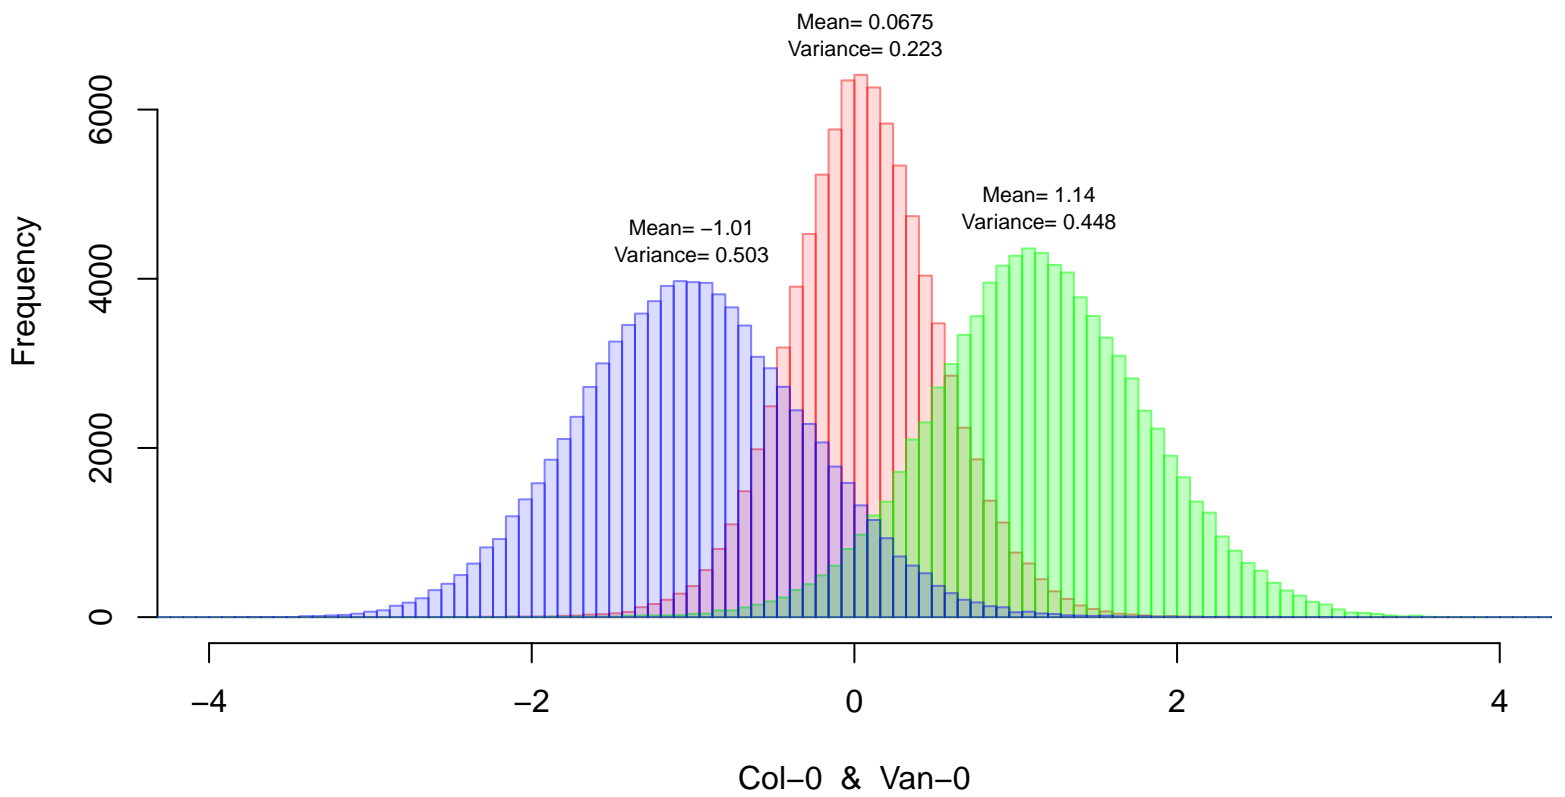

Supplement: S4 (10.1371/journal.pone.0015993.s004) [file journal.pone.0015993.s004.pdf › journal.pone.0015993.s004.pdf]
